# Supplementary material for: River Breezes for Pollutant Dispersion in GoAmazon2014/5
Source: Copernicus journal article supplement (doi:10.5194/acp-2018-347), 2018-04-23
Supplement: Supplementary file 1 [file acp-2018-347-supplement.pdf]

*Supplementary Information*

**River Breezes for Pollutant Dispersion in GoAmazon2014/5**

Adan S. S. Medeiros<sup>1,2</sup>, Igor O. Ribeiro<sup>1</sup>, Marcos V. B. Morais<sup>4</sup>, Rita V. Andreoli<sup>3</sup>, Jorge A. Martins<sup>5</sup>, Leila D. Martins<sup>6</sup>, Carla E. Batista<sup>1</sup>, Patrícia C. Guimarães<sup>1</sup>, Scot T. Martin<sup>\*,7</sup>, Rodrigo A. F. Souza<sup>\*,3</sup>.

<sup>1</sup> Post-graduate Program in Climate and Environment, CLIAMB, INPA/UEA, Av. André Araújo, 2936, 69060001, Manaus, Amazonas, Brazil

<sup>2</sup> Amazonas State University, Center of Superior Studies of Tefé, R. Brasília, 2127, 69470-000, Tefé, Amazonas, Brazil

<sup>3</sup> Amazonas State University, Superior School of Technology, Av Darcy Vargas, 1200, 69065020, Manaus, Amazonas, Brazil

<sup>4</sup> Post-graduate Program in Environmental Engineering, Federal University of Technology, Av dos Pioneiros, 3131, 86047-125, Londrina, Paraná, Brazil;

<sup>5</sup> Department of Physics, Federal University of Technology, Av dos Pioneiros, 3131, 86047-125, Londrina, Paraná, Brazil;

<sup>6</sup> Department of Chemistry, Federal University of Technology, Av dos Pioneiros, 3131, 86047-125, Londrina, Paraná, Brazil;

<sup>7</sup> School of Engineering and Applied Sciences, Harvard University, 02138, Cambridge, Massachusetts, USA

*E-mail: scot\_martin@harvard.edu, souzaraf@gmail.com*

*Atmospheric Chemistry and Physics*

\*To Whom Correspondence Should be addressed

## List of Figures

**Figure S1.** Comparison between observed (red) and simulated (blue) daily cycle of temperature, relative humidity, and wind speed at the T3 supersite for March 2014. Box-whisker plot represents quartiles for the box, median for the line, full range of values except outliers for the whiskers, and outliers as crosses. An outlier is defined as  $>1.5\times$  of the interquartile range.

**Table S1.** Differences in pollutant concentration  $X$  (ppb) for the case of wR (“with rivers”) compared to that of woR (“without rivers”), calculated as  $X_{\text{wR}} - X_{\text{woR}}$ , where  $X$  is the monthly mean at 00:00, 06:00, 12:00, and 18:00 (local) for each of O<sub>3</sub>, NO<sub>x</sub>, and CO. Results are shown for locations T3, R1, and R2.

|            | O <sub>3</sub> | NO <sub>x</sub> | CO   |
|------------|----------------|-----------------|------|
| T3 (00:00) | +0.8           | -0.4            | +2.5 |
| R1 (00:00) | +3.9           | +2.3            | +4.6 |
| R2 (00:00) | +5.9           | +1.9            | +4.0 |
| T3 (06:00) | 0.0            | -1.1            | +0.8 |
| R1 (06:00) | +3.0           | +6.8            | +3.8 |
| R2 (06:00) | +4.2           | +2.5            | +4.1 |
| T3 (12:00) | -2.1           | -0.1            | -0.2 |
| R1 (12:00) | +11.1          | +0.6            | +5.4 |
| R2 (12:00) | +12.2          | +1.7            | +2.6 |
| T3 (18:00) | +2.9           | +0.1            | +2.4 |
| R1 (18:00) | +3.6           | +0.3            | +3.0 |
| R2 (18:00) | +2.1           | 0.0             | +2.2 |

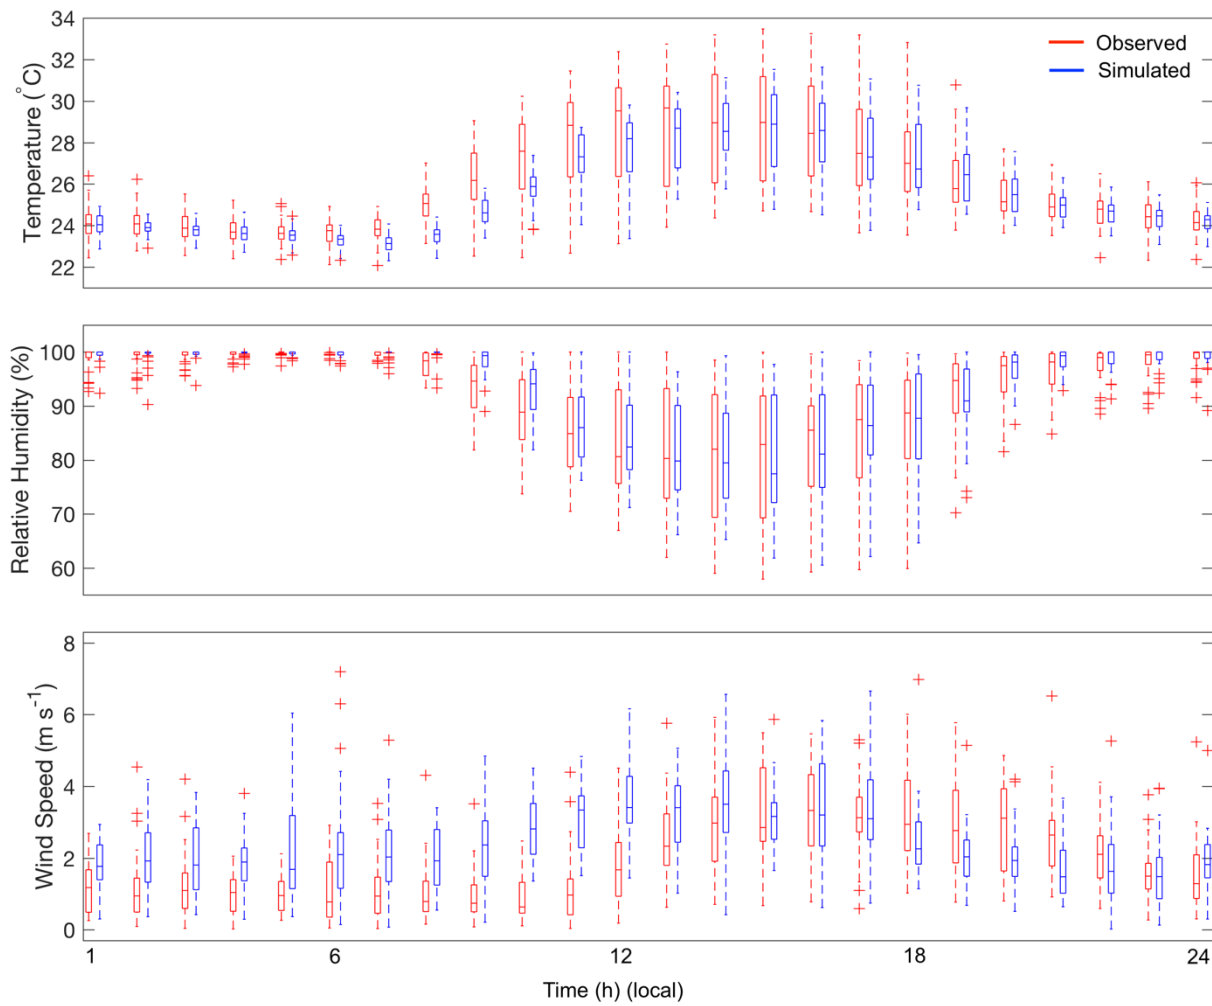

**Figure S1**
